# Supplementary material for: Risk for cardiovascular disease associated with metabolic syndrome and its components: a 13-year prospective study in the RIVANA cohort
Source: PubMed Central journal article supplement (PMC7680587; doi:10.1186/s12933-020-01166-6), 2020-11-22
Supplement: 12933_2020_1166_MOESM1_ESM.pdf [file 12933_2020_1166_MOESM1_ESM.pdf]

**Risk for cardiovascular disease associated with metabolic syndrome and its components: a 13-year prospective study in the RIVANA cohort**

**Additional file 1**

**Risk for cardiovascular disease associated with metabolic syndrome and its components: a 13-year prospective study in the RIVANA cohort**

María J. Guembe\*, Cesar I. Fernandez-Lazaro\*, Carmen Sayon-Orea, Estefanía Toledo, Conchi Moreno-Iribasand, for the RIVANA Study Investigators

\* María J. Guembe and Cesar I. Fernandez-Lazaro co-first authors

**Appendix S1.** Diagnostic criteria for endpoints of the study.

**Appendix S2.** Percentages of imputed information for imputed variables.

**Appendix S3.** Causes of death, including coronary heart disease, cerebrovascular disease, other cardiovascular causes, other non-cardiovascular causes, cancer, and unknown causes, among the participants of the Rivana (Vascular Risk in Navarre) cohort (n=3,976).

**Appendix S4.** Kaplan-Meier estimates of the cumulative incidence of A) myocardial infarction, B) stroke, C) mortality from cardiovascular causes, and D) all-cause mortality according to the number of metabolic syndrome traits (0-1 trait, 2 traits, 3 traits, 4 traits, and 5 traits) in the Rivana cohort (n=3,976).

## Risk for cardiovascular disease associated with metabolic syndrome and its components: a 13-year prospective study in the RIVANA cohort

### 1. **Primary end point**

The primary endpoint was defined as the first occurrence of cardiovascular death, myocardial infarction, or stroke. All of these components of the primary endpoint were additionally secondary end points as defined below.

### 2. **Secondary endpoints**

Secondary endpoints were defined according to the International Classification of Diseases, Ninth and Tenth Revision (ICD-9 and ICD-10) and satisfying the following criteria:

#### **A) Myocardial infarction (CIE-9: 410-411; CIE-10: I21-I22)**

Criteria: One of the following criteria satisfies the diagnosis of acute myocardial infarction

- Presence of ECG (Development of pathologic Q waves in the ECG throughout the acute phase) or presence of troponins (>percentile 95) with clinical suggestion of myocardial infarction, and in the following cases:
  - Common, uncommon or poorly described symptoms, along with probable ECG (modification of the ST segment or inverted T wave during the episode) and abnormal enzymes (CK>percentile 95 or CK-MB>percentile 99) in the absence of troponins
  - Common symptoms, abnormal enzymes (CK>percentile 95 or CK-MB>percentile 99) and ischemic ECG (modification of the ST segment or inverted T wave during episode), non-codable (due to branch blockage or presence of pacemaker), or not available.
- Diagnosis from a pathological examination

#### **B) Stroke (CIE-9: 430-438 CIE-10: I60-I69)**

Acute neurological deficit lasting more than 24 hours caused by focal ischemia cerebral caused by the following syndromes: lacunar infarction, atherothrombotic infarction, infarction of cardio-embolic origin (secondary to arrhythmias, valvular diseases, or cardiopathies embolization), cerebral and subarachnoid hemorrhages. We excluded those secondary to hematological diseases (leukemias, polycythemia vera), brain metastases and head injuries. The diagnosis must be confirmed by an imaging test (CT or MRI) or confirmed by a pathological examination.

#### **C) Mortality from cardiovascular disease**

We included the following causes of death according to the International Classification of Diseases, Ninth and Tenth Revision (ICD-9 and ICD-10):

- CIE-9: 401-405, 410-414, 426-428, 429.1-429.9, 430-435, 436-438 (excluding 437.4-437.8), 443.8, 443.9, 798.1; 798.2
- CIE-10: G45-G46, I05-I09, I10-I16, I20-I25, I26-I52, I60-I69, I70-I79, I99, R00-R01

#### **D) All-cause mortality**

This end point includes all causes of death, including cardiovascular and non-cardiovascular causes. All deaths were confirmed by reviewing the National Statistics Institute of Spain.

**Appendix S1.** Diagnostic criteria for endpoints of the study.

**Risk for cardiovascular disease associated with metabolic syndrome and its components: a 13-year prospective study in the RIVANA cohort**

**Appendix S2.** Percentages of imputed information for imputed variables.

| <b>Characteristic</b>            | <b>Percentage of imputed values</b> |
|----------------------------------|-------------------------------------|
| <u>At baseline</u>               |                                     |
| <i>Risk and clinical factors</i> |                                     |
| Waist circumference              | 0.20                                |
| BMI                              | 0.05                                |
| Systolic BP                      | 0.03                                |
| Diastolic BP                     | 0.03                                |
| Total cholesterol                | 0.03                                |
| LDL-cholesterol                  | 1.00                                |
| C-Reactive protein               | 0.03                                |

Abbreviations: BMI, body mass index; BP, blood pressure; LDL, low density lipoprotein.

**Risk for cardiovascular disease associated with metabolic syndrome and its components:  
a 13-year prospective study in the RIVANA cohort**

**Appendix S3.** Causes of death, including coronary heart disease, cerebrovascular disease, other cardiovascular causes, other non-cardiovascular causes, cancer, and unknown causes, among the participants of the Rivana (Vascular Risk in Navarre) cohort (n=3,976).

| <b>Causes of death<sup>1</sup></b>           | <b>Overall</b> | <b>No metabolic syndrome</b> | <b>Metabolic syndrome</b> |
|----------------------------------------------|----------------|------------------------------|---------------------------|
| N (frequency)                                | 381            | 143 (37.5%)                  | 238 (62.5%)               |
| <sup>2</sup> Coronary heart disease          | 23 (6.0%)      | 7 (4.9%)                     | 16 (6.7%)                 |
| <sup>3</sup> Cerebrovascular disease         | 17 (4.5%)      | 7 (4.9%)                     | 10 (4.2%)                 |
| <sup>4</sup> Other cardiovascular causes     | 45 (11.8%)     | 14 (9.8%)                    | 31 (13.0%)                |
| <sup>5</sup> Other non-cardiovascular causes | 134 (35.2%)    | 51 (35.7%)                   | 83 (34.9%)                |
| <sup>6</sup> Cancer                          | 157 (41.2%)    | 62 (43.4%)                   | 95 (39.9%)                |
| Unknown causes                               | 5 (1.3%)       | 2 (1.4%)                     | 3 (1.3%)                  |

<sup>1</sup>Causes of death were defined according to the International Classification of Diseases, Ninth (ICD-9) and Tenth Revision (ICD-10)

<sup>2</sup>Cardiovascular heart disease included the following diagnosis, CIE-9: 410-414; CIE-10: I20-I25

<sup>3</sup>Cerebrovascular disease included the following diagnosis, CIE-9: 430-438 (excluding 437.4-437.8); CIE-10: I60-I69

<sup>4</sup>Other cardiovascular causes included the following diagnosis, CIE-9: 401-405, 426-428, 429.1-429.9, 443.8, 443.9, 798.1; 798.2; CIE-10: G45-G46, I05-I09, I10-I16, I26-I52, I70-I79, I99, R001.4, R00-R01.

<sup>5</sup>Other non-cardiovascular causes included the rest of deceases (except unknown causes of death)

<sup>6</sup>Cancer included the following diagnosis, CIE-9: 140-239; CIE-10: C00-D49

# Risk for cardiovascular disease associated with metabolic syndrome and its components: a 13-year prospective study in the RIVANA cohort

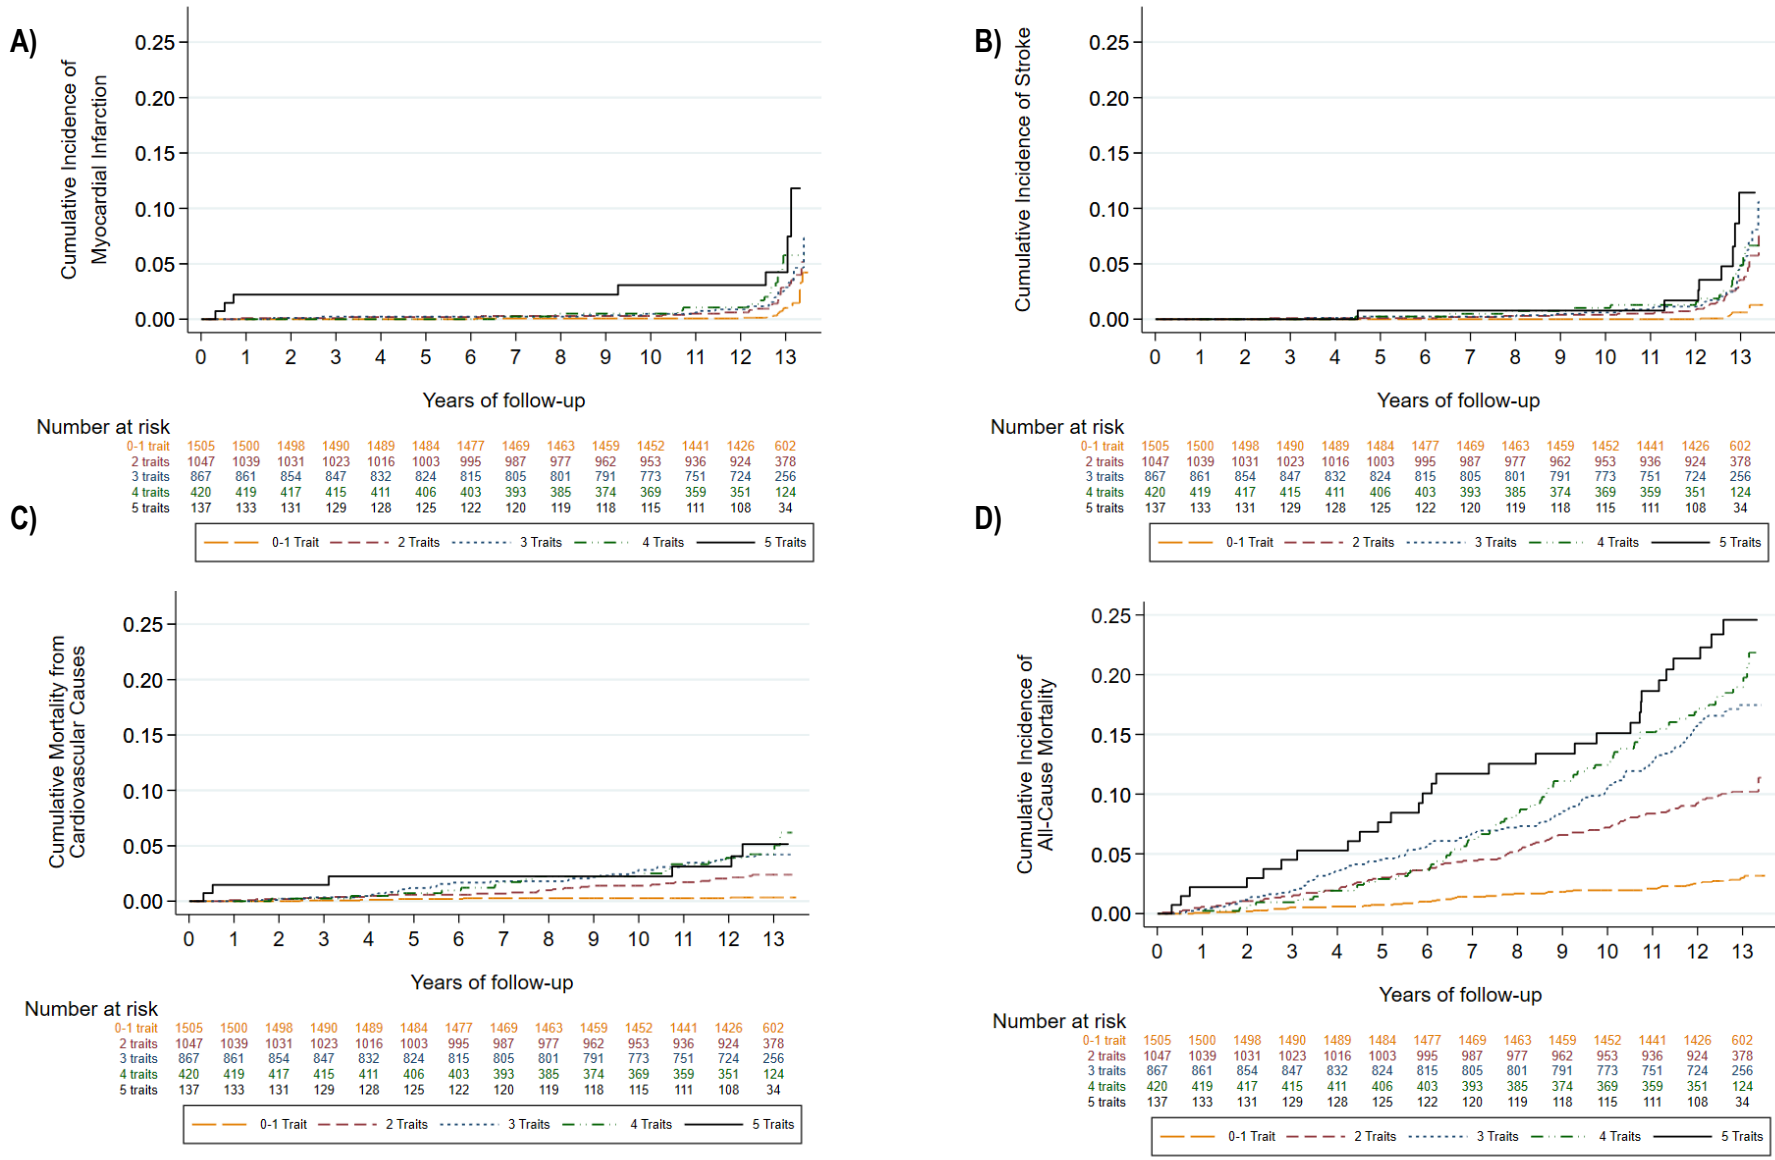

**Appendix S4.** Kaplan-Meier estimates of the cumulative incidence of A) myocardial infarction, B) stroke, C) mortality from cardiovascular causes, and D) all-cause mortality according to the number of metabolic syndrome traits (0-1 trait, 2 traits, 3 traits, 4 traits, and 5 traits) in the Rivana cohort (n=3,976).
